# Supplementary material for: cAMP activates calcium signalling via phospholipase C to regulate cellulase production in the filamentous fungus Trichoderma reesei
Source: Springer Nature journal article supplement (doi:10.1186/s13068-021-01914-0), 2021-03-08

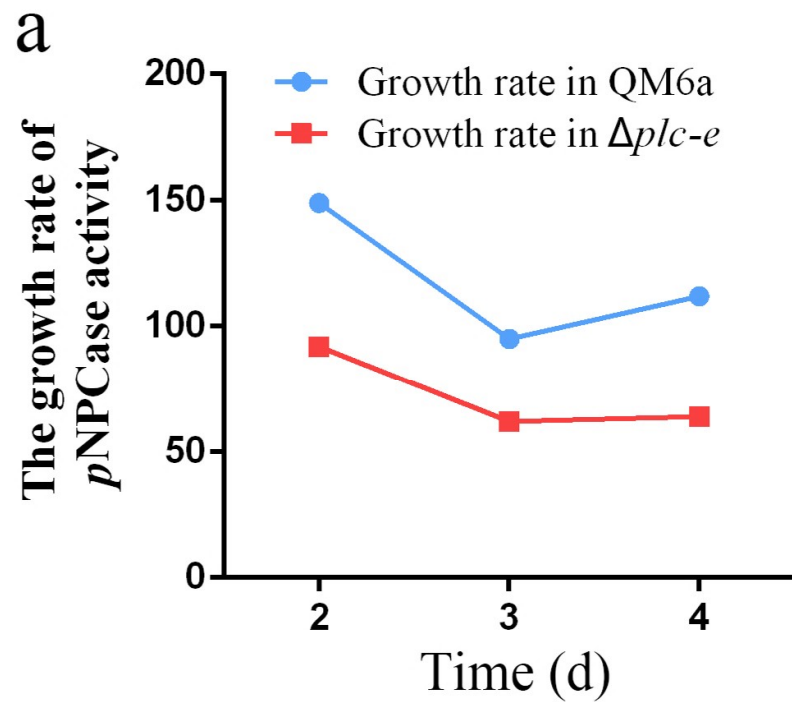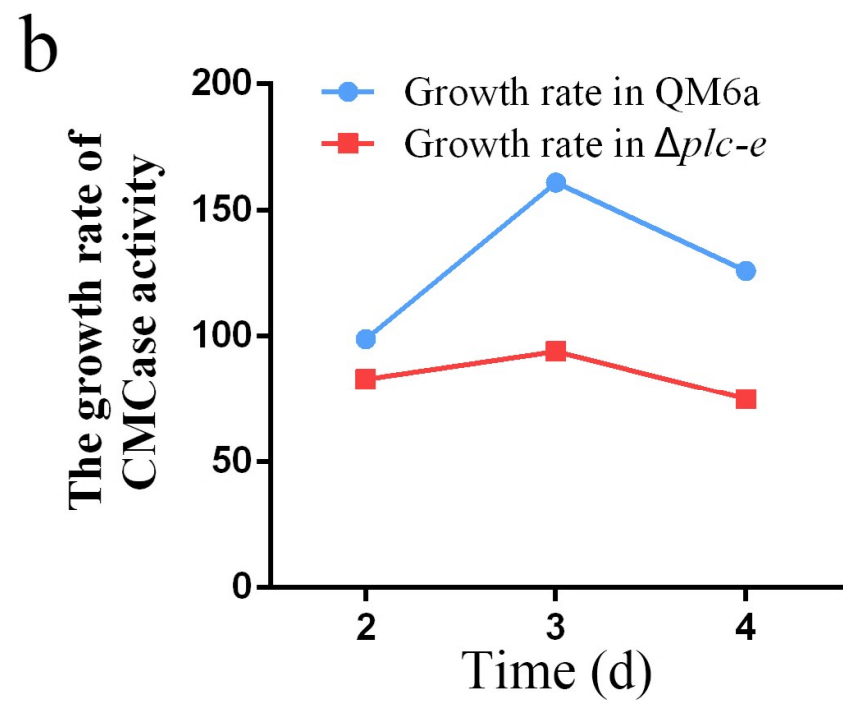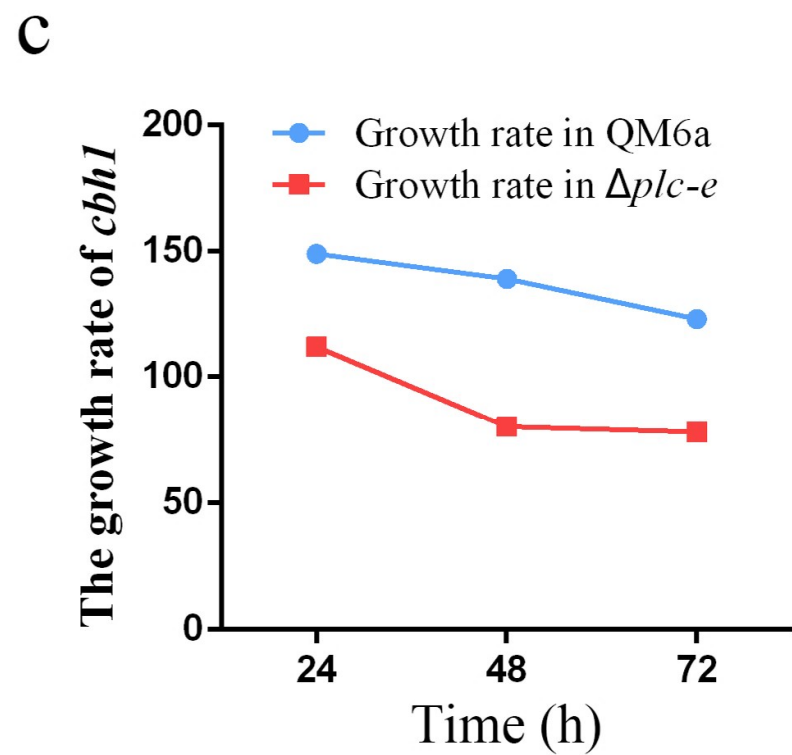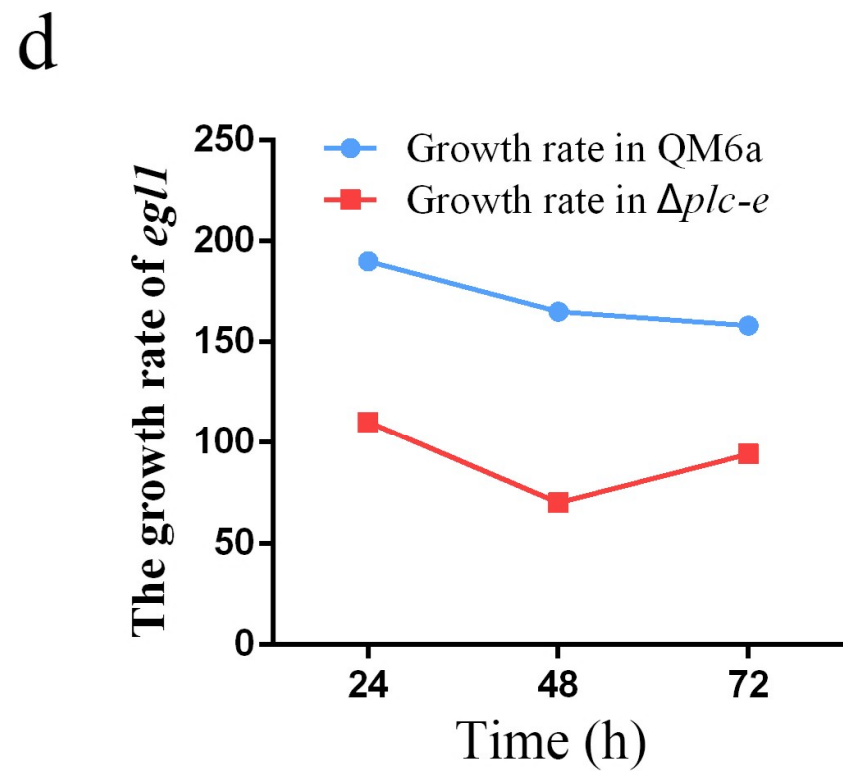

Supplement: MOESM11 [file 13068_2021_1914_MOESM11_ESM.pdf]
